# Supplementary material
Source: PubMed Central journal article supplement (PMC5556388)

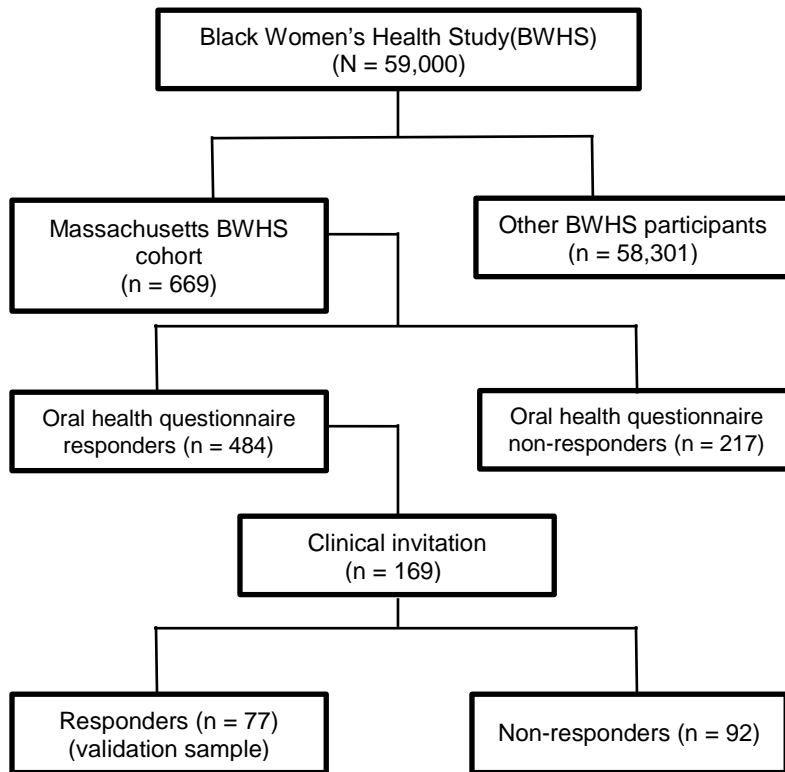

**Supplementary Figure 1.**

*Flowchart of participant recruitment.*

Supplement: NIHMS890988-supplement-Figure_1.pdf [file NIHMS890988-supplement-Figure_1.pdf]
